# Supplementary material
Source: publisher figshare collection journal article supplement (https://sage.figshare.com/ndownloader/files/14625539)
Supplement: Supplementary file 1 [file 14625539]

**Supplemental Table 1.** Characteristics of Respondents

| Characteristic    | Number | Percent |
|-------------------|--------|---------|
| Practice Setting  |        |         |
| Academic          | 92     | 31%     |
| Community         | 70     | 23%     |
| Private           | 136    | 46%     |
| Total             | 298    | 100%    |
| Gender            |        |         |
| Male              | 218    | 73%     |
| Female            | 80     | 27%     |
| Total             | 298    | 100%    |
| Years in Practice |        |         |
| <10 yrs           | 109    | 37%     |
| 10-24 yrs         | 123    | 41%     |
| 25 yrs +          | 66     | 22%     |
| Total             | 298    | 100%    |
| Geographic Region |        |         |
| Midwest           | 37     | 21%     |
| Northeast         | 48     | 27%     |
| South             | 62     | 35%     |
| West              | 29     | 16%     |
| Total             | 176    | 100%    |
